# Supplementary material for: π-Stacking interactions in some crystalline cisoid E,E-1,4-diaryl-1,3-butadienes
Source: Royal Society of Chemistry journal article supplement (doi:10.1039/b301578e), 2003-01-01
Supplement: b301578e.doc [file b301578e.doc]

# Experimental Procedures

Preparation of compound **3**:

To a solution of diisopropyl amine (3.2 ml, 0.024 mol) in THF (20 ml) at –10 oC, *n*-butyllithium (2.5 M, 8.0 ml, 0.020 mol) was added to the reaction. After 5 minutes, a solution of norcamphor (2.00 g, 0.018 mol) in THF (3 ml) was added to produce the lithium enol of norcamphor. After the resulting solution was stirred at 0 oC for 30 minutes, pentafluorobenzaldehyde (3.56 g, 0.018 mol) in THF (3 ml) was added, and the reaction was allowed to stir at room temperature for 30 minutes. Water was added to quench the reaction, and the mixture was extracted with ether for three times. The organic layers were combined, washed with brine, and dried over MgSO4. Ether was moved under reduced pressure to give the desired hydroxy product (5.51 g, ~99% yield).

1H-NMR (200 MHz, CDCl3) : 5.06 (1H, d, J = 11.0 Hz), 2.75 (1H, d, J = 3.3 Hz), 2.44 (1H, dd, J1 = 3.4 Hz, J2 = 11.0 Hz), 2.10-1.40 (7H, m).

13C-NMR (50.1 MHz, CDCl3) : 219.28, 148.00-113.00 (multiplet, -C6F5), 64.82, 55.74, 49.57, 37.82, 35.54, 28.01, 23.18.

To the above product* (5.51 g, 0.018 mol) in dichloromethane (16 ml) and pyridine (6.5 ml, 0.080 mol) at 0 oC, acetyl chloride (4 ml, 0.056 mol) was added dropwise. The reaction was monitored by TLC (10% ethyl acetate-90% hexanes). After the reaction was complete, water was added, and the organic layer was separated. The organic layer was washed with 3N HCl, neutralized with NaHCO3, and then dried over MgSO4. The solvent was removed under reduced pressure to give an oil product.

(*Note: Under a variety of experimental conditions, dehydration of the hydroxy product to directly prepare the fluorinated enone (**3**) was unsuccessful.)

Without separation, the oil product was dissolved in *tert*-butyl alcohol (15 ml) at 0 oC, and then KOtBu (2.24 g, 0.02 mol) was added. After stirred at room temperature for 12 hours, the reaction was quenched by addition of water. The resulting mixture was extracted with ether for three times. The combined ether was washed with brine, and dried over MgSO4. Ether was removed to give a crude product. The crude product was purified by column chromatography (10% ethyl acetate-90% hexanes) to give the fluorinated enone **3** (2.02 g, 39% yield based on norcamphor).

1H-NMR (200 MHz, CDCl3) : 6.89 (1H, bs), 3.15 (1H, bs), 2.83 (1H, m), 2.10-1.60 (6H, m).

13C-NMR (50.1 MHz, CDCl3) : 204.47, 148.96, 148.00-113.00 (multiplet, -C6F5), 110.09, 48.80, 41.62, 36.72, 26.77, 24.17.

Preparation of compound **1**:

TiCl4 (12 ml, 1.0 M, 0.012 mol) was added dropwise with a syringe to freshly distilled and cold (ca. 0 oC) tetrahydrofuran (6 ml) under nitrogen. Activated zinc dust (1.51 g, 0.023 mol) was added in portions to the yellow suspension, and then the reaction mixture was warmed to ambient temperature. The reaction mixture was heated to reflux. Pyridine (0.2 ml, 2.5 mmol) was added via a syringe with caution, and reflux was maintained for additional 30 min to obtain a fine, black suspension of “Titanium Reagent”. A solution of the fluorinated enone **3** (1.7 g, 0.006 mol) and pentafluorobenzaldehyde (1.76 g, 0.009 mol) in THF (3 ml) was added dropwise. The reaction mixture was further refluxed and monitored by TLC (10% ethyl acetate-90% hexanes). After the fluorinated enone **3** was consumed, the reaction mixture was poured into an ice water (15 ml). The aqueous solution was extracted with ether for three times, and the ether layer was washed with brine, and dried over MgSO4. After the solvent was removed, the residue was purified by column chromatography (hexanes) to give the title product **1** as a white solid (0.76 g, 28% yield) plus two side products (perfluorostilbene and the dimer formed from McMurry coupling of the fluorinated enone **3**). The white product was dissolved into ethyl acetate at room temperature. The solvent was slowly evaporated at room temperature to give colorless crystals.

UV max = 289 nm (hexanes).

1H-NMR (200 MHz, CDCl3) : 6.43 (2H, s), 2.92 (2H, s), 1.90-1.40 (8H, m).

13C-NMR (50.1 MHz, CDCl3) : 152.29, 148.00-113.00 (multiplet, -C6F5), 100.59, 43.08, 39.19, 26.90.

## Compound **2**

Compound **2** as a white solid was prepared according to reference 7. The white solid was dissolved into hot methanol, white crystals appeared after the solution was cooled to room temperature after a few hours.

UV max = 322 nm (hexane).

1H-NMR (200MHz, CDCl3) : 7.41 (4H, d, J = 7.0 Hz), 7.38 (4H, t, J = 7.0 Hz), 7.23 (2H, t, J = 7.0 Hz), 6.79 (2H, s), 3.48 (2H, s), 1.98 (2H, d, J = 7.0 Hz), 1.70 (2H, d, J = 7.0 Hz), 1.56 (1H, s), 1.44 (1H, s).

13C-NMR (50.1 MHz, CDCl3) : 147.28, 138.05, 128.54, 128.31, 126.28, 115.21, 41.34, 40.79, 27.86.

Preparation of the complex (**1**:**2**)

Compound **1** (12 mg, 0.027 mmol) and compound **2** (7.5 mg, 0.027 mmol) was dissolved into ethyl acetate (2 ml) at room temperature. The solvent was slowly evaporated at room temperature to give colorless crystals as the desired complex.

UV max = 310 nm (crystals of the complex in hexanes).
